# Supplementary material for: Multimodal neuroimaging alterations associated with transdiagnostic non-suicidal self-injury behaviors and suicidal attempts
Source: Research Square preprint supplement (doi:10.21203/rs.3.rs-7853752/v1), 2025-11-24
Supplement: Supplementary file 1 [file b1369175bc2f775b8b97fb05.docx]

**Table S1** Neuroimaging alterations in the non-suicidal self-injury behaviours subgroup and suicidal attempt subgroup

| **Subgroup** | **modality** | **Regions** | **Maximum**  **MNI coordinates** | | | **SDM Value** | ***P*** | **Number of voxels*** |
| --- | --- | --- | --- | --- | --- | --- | --- | --- |
|  |  |  | X | Y | Z |  |  |  |
| **NSSI > controls** | **fMRI** | Left inferior network, inferior longitudinal fasciculus | -10 | -80 | -4 | 1.638 | 0.000010312 | 662 |
|  |  | Left median cingulate / paracingulate gyri | -14 | -36 | 42 | 1.569 | 0.000082552 | 108 |
| **NSSI < controls** | **fMRI** | Right middle temporal gyrus, BA 39 | 50 | -66 | 16 | -1.790 | 0.000185788 | 383 |
|  |  | Right superior frontal gyrus, medial, BA 10 | 4 | 52 | 30 | -1.999 | 0.000036120 | 216 |
| **SA > controls** | **GMV** | Left precuneus | 0 | -56 | 20 | 1.847 | 0.000175476 | 71 |
| **SA < controls** | **GMV** | Right lingual gyrus, BA 27 | 12 | -46 | 0 | -2.120 | 0.000010312 | 549 |
|  |  | Left middle frontal gyrus, BA 9 | -24 | 36 | 42 | -1.492 | 0.000603795 | 19 |

*All voxels with *P* < 0.001.

BA: Brodmann area; GMV: gray matter volume; MNI, Montreal Neurological Institute; NSSI: non-suicidal self-injury; SA: suicidal attempts; SDM, seed‐based dmapping.

**Table S2** Neuroimaging alterations in the adolescent subgroup and adult subgroup

| **Subgroup** | **modality** | **Regions** | **Maximum**  **MNI coordinates** | | | **SDM Value** | ***P*** | **Number of voxels*** |
| --- | --- | --- | --- | --- | --- | --- | --- | --- |
|  |  |  | X | Y | Z |  |  |  |
|  |  |  |  |  |  |  |  |  |
| **Adolescents > controls** | **fMRI** | Left inferior network, inferior longitudinal fasciculus | -10 | -80 | -4 | 1.528 | 0.000227094 | 94 |
|  |  | Left inferior network, inferior longitudinal fasciculus | -28 | -88 | -2 | 1.452 | 0.000536740 | 49 |
|  |  | Left superior longitudinal fasciculus I | -16 | -36 | 38 | 1.516 | 0.000232220 | 38 |
|  |  | Left inferior temporal gyrus, BA 20 | -50 | -30 | -26 | 1.439 | 0.000572860 | 10 |
|  | **GMV** | Left cerebellum, crus I Left cerebellum, crus I Left cerebellum, crus I | -26 | -82 | -32 | 1.113 | 0.000015497 | 215 |
| **Adolescents < controls** | **GMV** | Corpus callosum | 8 | 52 | 34 | -1.686 | 0.000392199 | 23 |
|  |  | Left superior frontal gyrus, medial, BA 9 | -6 | 50 | 38 | -1.677 | 0.000407696 | 23 |
|  |  | Left insula, BA 48 | -36 | -2 | -10 | -1.688 | 0.000056744 | 376 |
| **Adults > controls** | **fMRI** | Left posterior cingulate gyrus, BA 30 | -2 | -52 | 22 | 2.310 | 0.000020623 | 530 |
| **Adults < controls** | **fMRI** | Left angular gyrus, BA 39 | -48 | -70 | 28 | -1.720 | 0.000232220 | 256 |
|  |  | Right inferior parietal (excluding supramarginal and angular) gyri, BA 40 | 44 | -54 | 52 | -1.615 | 0.000593483 | 14 |
|  | **GMV** | Right lingual gyrus | 8 | -50 | 0 | -2.068 | ~0 | 402 |

*All voxels with *P* < 0.001.

BA: Brodmann area; GMV: gray matter volume; MNI, Montreal Neurological Institute; NSSI: non-suicidal self-injury; SA: suicidal attempts; SDM, seed‐based dmapping.
